# Supplementary material for: Decarbonating layered double hydroxides using a carbonated salt solution
Source: Royal Society of Chemistry journal article supplement (doi:10.1039/d3dt01079a), 2023-01-01
Supplement: d3dt01079a1.pdf [file d3dt01079a1.pdf]

## Electronic Supplementary Information

### Decarbonating layered double hydroxides with carbonated salt solution

Luofu Min, Jingying Duan, Chuan Song, Yanan Chen, Wen Zhang, Yuxin Wang\*

State Key Laboratory of Chemical Engineering

Tianjin Key Laboratory of Membrane Science and Desalination Technology

School of Chemical Engineering and Technology, Tianjin University, Tianjin 300072, China.

\*Corresponding author. E-mail address: [yxwang@tju.edu.cn](mailto:yxwang@tju.edu.cn)

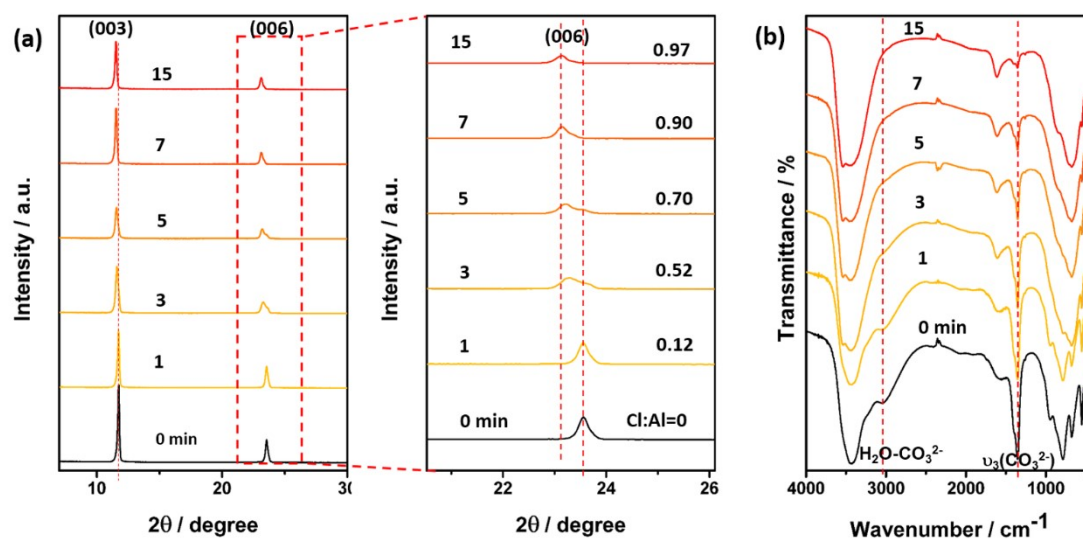

**Fig. S1** Decarbonation process of  $\text{Mg}_2\text{Al-LDH-CO}_3$  by carbonated  $\text{NaCl}$  solution. (a) XRD patterns and (b) FTIR spectra as a function of reaction time. The diffraction signal from the (006) plane of  $\text{Mg}_2\text{Al-LDH}$  LDHs splits into two peaks during the decarbonation process, indicating a phase transformation from  $\text{Mg}_2\text{Al-LDH-CO}_3$  to  $\text{Mg}_2\text{Al-LDH-Cl}$ . Furthermore, peaks assigned to  $\text{CO}_3^{2-}$  at  $3000\text{ cm}^{-1}$  and  $1360\text{ cm}^{-1}$  in FTIR spectra of LDHs dimed as a function of time.

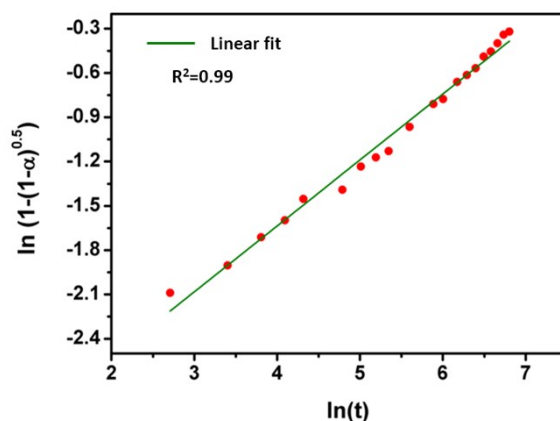

**Fig. S2** Decarbonation kinetic analysis. 2D advancing interface model<sup>1</sup> fitted well with the decarbonation of MgAl-LDH by carbonated NaCl solution. The reaction extent  $\alpha$  (Cl/Al ratio in LDHs) of decarbonation process is associated with the increment of carbonate in the solution, and  $t$  represents the reaction time. The exact increment of carbonate in decarbonation system was calculated from the dissociation equilibrium constant of  $\text{H}_2\text{CO}_3\text{-HCO}_3^-\text{-CO}_3^{2-}$  and real-time pH value in **Fig. 1b**. The decarbonation kinetic demonstrate that the decarbonation reaction advances along the channel. The coexistence of  $\text{Mg}_2\text{Al-LDH-CO}_3$  and  $\text{Mg}_2\text{Al-LDH-Cl}$  phase in **Fig. S1** during the initial stage of the decarbonation process is also in line with the advancing interface model.

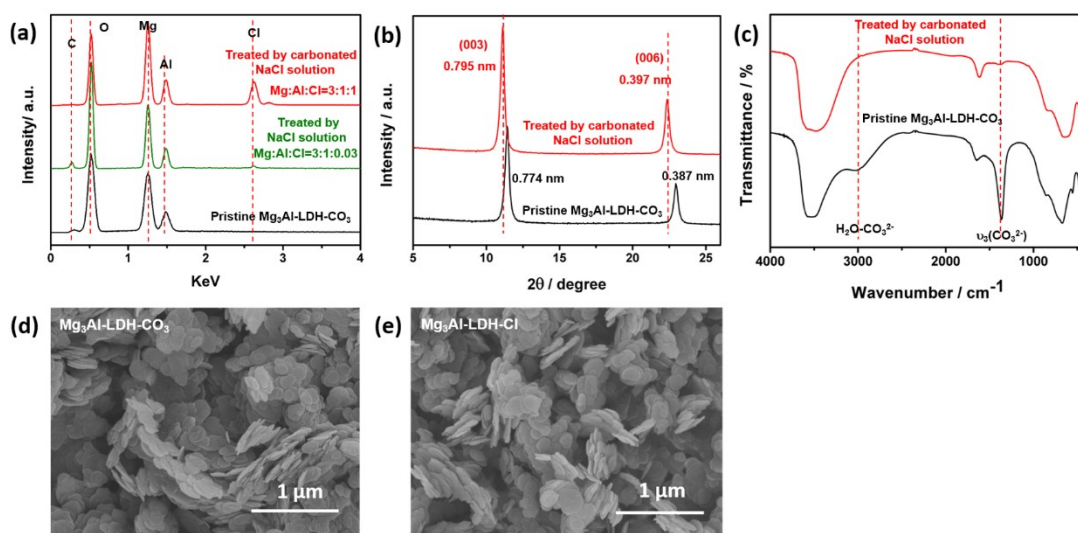

**Fig. S3** (a) EDS spectra indicating complete decarbonation of  $\text{Mg}_3\text{Al-LDH-CO}_3$ ; (b) XRD patterns showing the peak shift and d-spacing change from  $\text{Mg}_3\text{Al-LDH-CO}_3$  to  $\text{Mg}_3\text{Al-LDH-Cl}$ ; (c) FTIR spectra showing the disappearance of  $\text{CO}_3^{2-}$  vibration peaks; (d & e) SEM images indicating well-kept morphology of  $\text{Mg}_3\text{Al-LDH}$  after anion exchange from  $\text{CO}_3^{2-}$  to  $\text{Cl}^-$ .

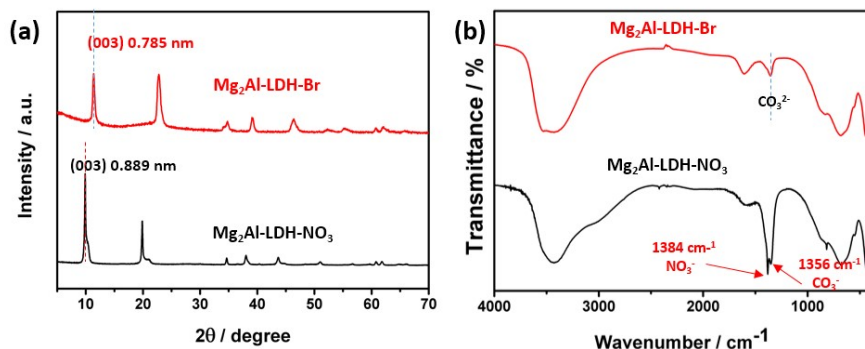

**Fig. S4** Decarbonation of  $\text{Mg}_2\text{Al-LDH-CO}_3$  by carbonated  $\text{NaNO}_3$  and  $\text{NaBr}$  solution. (a) XRD patterns (b) FTIR spectra of  $\text{Mg}_2\text{Al-LDH-Br}$  and  $\text{Mg}_2\text{Al-LDH-NO}_3$ . The peak at  $1356\text{ cm}^{-1}$  is attributed to the residual  $\text{CO}_3^{2-}$  in LDHs.

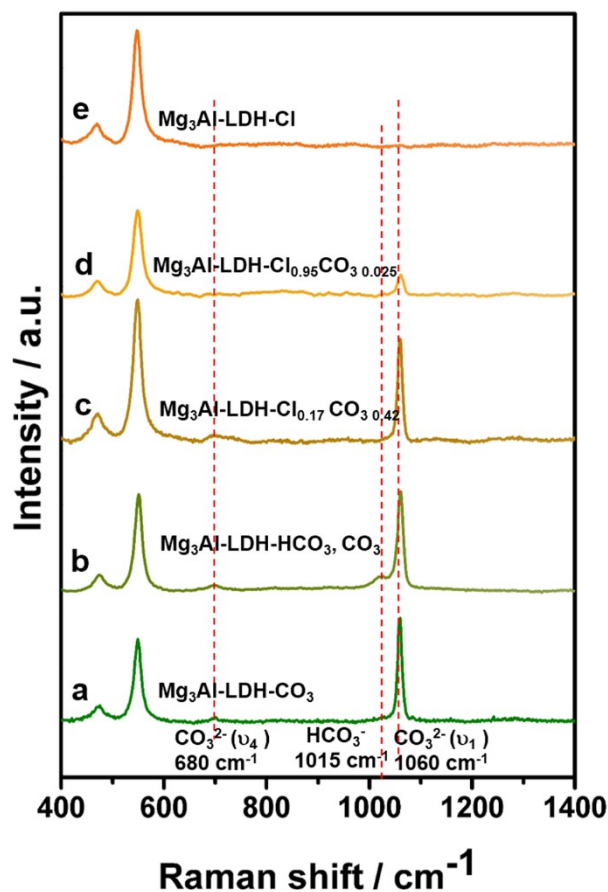

**Fig. S5** Raman spectra of (a) pristine  $\text{Mg}_3\text{Al-LDH-CO}_3$ , (b)  $\text{Mg}_3\text{Al-LDH-CO}_3$  treated with carbonated water, (c)  $\text{Mg}_3\text{Al-LDH}$  first treated with carbonated water then  $\text{NaCl}$  solution, (d) pristine  $\text{Mg}_3\text{Al-LDH-CO}_3$  treated with carbonated  $\text{NaCl}$  solution for 8 minutes and (e) pristine  $\text{Mg}_3\text{Al-LDH-CO}_3$  treated with carbonated  $\text{NaCl}$  solution for two rounds. In contrast to  $\text{CO}_3^{2-}$ ,  $\text{HCO}_3^-$  in LDHs can be easily substituted by  $\text{Cl}^-$ . After  $\text{MgAl-LDH}$  intercalated with  $\text{HCO}_3^-$  was treated with  $\text{NaCl}$  solution, the  $\text{Cl/Al}$  ratio of LDHs is 0.17. In addition,

the absence of  $\text{HCO}_3^-$  in LDHs during the decarbonation process demonstrates that almost all of the  $\text{HCO}_3^-$  in LDHs are substituted by  $\text{Cl}^-$ . The residual anion in LDHs is only  $\text{CO}_3^{2-}$ , confirming  $\text{MgAl-LDH-HCO}_3$  with higher anion-exchange ability than that of  $\text{MgAl-LDH-CO}_3$ .

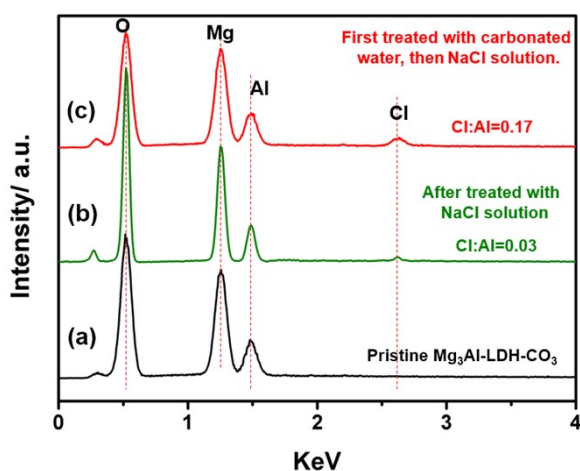

**Fig. S6** EDS spectra of (a) pristine  $\text{Mg}_3\text{Al-LDH-CO}_3$ , (b)  $\text{Mg}_3\text{Al-LDH-CO}_3$  treated with only NaCl solution, (c)  $\text{Mg}_3\text{Al-LDH}$  first treated with carbonated water, then treated with NaCl solution. Massive Cl was detected after LDH intercalated with  $\text{HCO}_3^-$  was treated with NaCl solution.

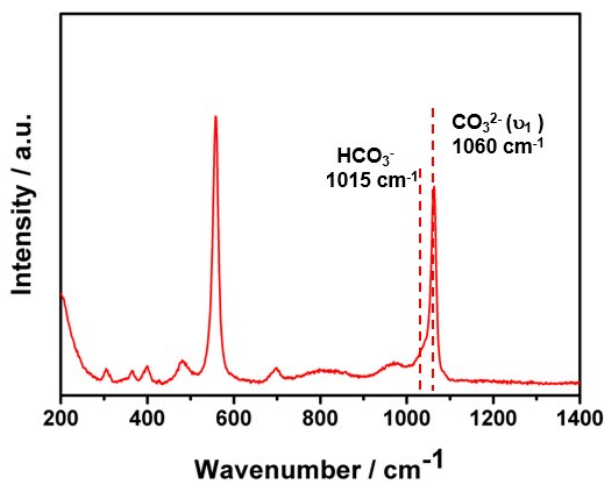

**Fig. S7** Raman spectrum of  $\text{Mg}_2\text{Al-LDH-CO}_3$  treated with carbonated water.

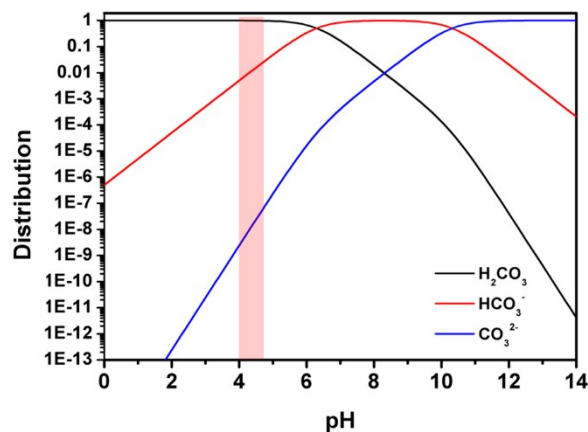

**Fig. S8** Distribution coefficient of H<sub>2</sub>CO<sub>3</sub>-HCO<sub>3</sub><sup>-</sup>-CO<sub>3</sub><sup>2-</sup> as a function of pH. Although CO<sub>3</sub><sup>2-</sup> is always accompanied by HCO<sub>3</sub><sup>-</sup> because of the dissociation equilibrium, CO<sub>3</sub><sup>2-</sup> was dramatically depressed in carbonated water, and the content of CO<sub>3</sub><sup>2-</sup> is in the range of 10<sup>-7</sup> ~ 10<sup>-9</sup>.

**Tab. S1.** Hydration energy for various anions.<sup>2</sup>

| Anion                         | Hydration energy / kJ mol <sup>-1</sup> |
|-------------------------------|-----------------------------------------|
| CO <sub>3</sub> <sup>2-</sup> | -1315                                   |
| OH <sup>-</sup>               | -430                                    |
| F <sup>-</sup>                | -465                                    |
| Cl <sup>-</sup>               | -340                                    |
| HCO <sub>3</sub> <sup>-</sup> | -335                                    |
| Br <sup>-</sup>               | -315                                    |
| NO <sub>3</sub> <sup>-</sup>  | -300                                    |
| I <sup>-</sup>                | -275                                    |

## References

1. L. Palin, M. Milanesio, W. van Beek and E. Conterposito, *J. Nanomater.*, 2019, **2019**, 1-9.
2. Y. Marcus, *J. Chem. Soc., Faraday Trans.*, 1991, **87**, 2995-2999.
